# Supplementary material for: Enhancing Osteogenic Potential: Controlled Release of Dopamine D1 Receptor Agonist SKF38393 Compared to Free Administration
Source: Biomedicines. 2024 May 9;12(5):1046. doi: 10.3390/biomedicines12051046 (PMC11117781; doi:10.3390/biomedicines12051046)
Supplement: Supplementary file 1 [file biomedicines-12-01046-s001.zip]

Archive with 4 entries (4 files):
- Figure Legends.pdf
- Figure S1.tif
- Figure S2.tif
- Figure S3.png
